# Supplementary material
Source: publisher figshare collection journal article supplement (https://acs.figshare.com/ndownloader/files/5064145)
Supplement: Supplementary file 1 [file 5064145]

Supporting Information for “New BODIPY Derivatives as OFF-ON  
Fluorescent Chemosensor and Fluorescent Chemodosimeter for Cu<sup>2+</sup>:  
Cooperative Selectivity Enhancement towards Cu<sup>2+</sup>”

*Xin Qi,<sup>a</sup> Eun Jin Jun,<sup>a</sup> Li Xu,<sup>a</sup> Sung-Jin Kim,<sup>a</sup> Jay Sung Joong Hong,<sup>b</sup> Yeo Joon Yoon,<sup>a</sup> and  
Juyoung Yoon<sup>a\*</sup>*

<sup>a</sup>*Department of Chemistry and Division of Nano Science, Ewha Womans University, 11-1  
Daehyeon-Dong, Sodaemun-Ku, Seoul 120-750, Korea*

<sup>b</sup>*Interdisciplinary Program of Biochemical Engineering and Biotechnology, Seoul National  
University, San 56-1, Shilim-dong, Gwanak-gu, Seoul 151-742, South Korea  
jyoon@ewha.ac.kr*

|                            |         |
|----------------------------|---------|
| Experimental Section ..... | S1 page |
| S – Figure 1 .....         | S2 page |
| S – Table 1 .....          | S2 page |
| S – Table 2 .....          | S2 page |
| S – Figure 2 .....         | S3 page |
| S – Figure 3 .....         | S3 page |
| S – Figure 4 .....         | S3 page |
| S – Figure 5 .....         | S4 page |
| S – Figure 6 .....         | S4 page |
| S – Figure 7 .....         | S5 page |
| S – Figure 8 .....         | S5 page |
| S – Figure 9 .....         | S6 page |
| S – Figure 10.....         | S6 page |

## Experimental Section

General methods. Unless otherwise noted, materials were obtained from commercial suppliers and were used without further purification. Flash chromatography was carried out on silica gel (230-400 mesh). Melting points were measured, and are uncorrected. <sup>1</sup>H NMR and <sup>13</sup>C NMR spectra were recorded using 250 MHz or 500 MHz NMR. Chemical shifts were expressed in ppm and coupling constants (*J*) in Hz. Electrospray ionization mass (ESI MS) was taken by infusing samples directly into the source at 20ul/min using a syringe pump. The spray voltage was set at 3KV and the capillary temperature at 150 °C.

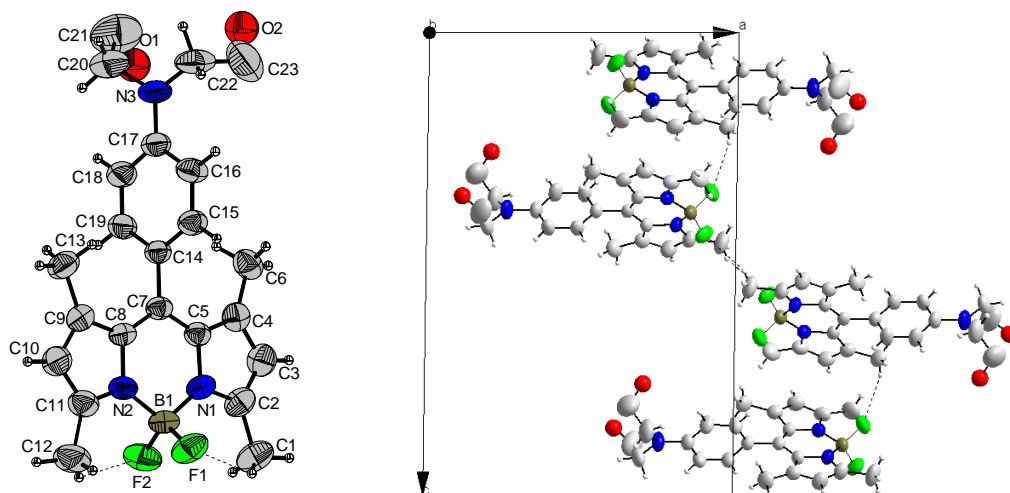

**S-Figure 1.** X-ray crystal structures of the compound **1** and the packing of the compound **1** in the unit cell.

**S-Table 1.** Hydrogen-bonding geometry (Å, °) for **2**

| D-H...A                    | D-H  | H...A | D...A    | D-H...A |
|----------------------------|------|-------|----------|---------|
| C15-H15C...F1 <sup>i</sup> | 0.96 | 2.45  | 3.293(4) | 146     |
| C1-H1A...F1                | 0.96 | 2.61  | 3.122(3) | 114     |
| C1-H1C...F1 <sup>ii</sup>  | 0.96 | 2.70  | 3.145(6) | 109     |

Symmetry code: (i) 0.5+x, 1.5-y, 0.5+z; (ii) 2-x, y, 1.5-z.

**S-Table 2.** Hydrogen-bonding geometry (Å, °) for **1**

| D-H...A                     | D-H  | H...A    | D...A    | D-H...A |
|-----------------------------|------|----------|----------|---------|
| C6-H6C...F2 <sup>i</sup>    | 0.96 | 2.646(1) | 3.525(1) | 152     |
| C12-H12C...F1 <sup>ii</sup> | 0.96 | 2.545(3) | 3.356(3) | 142     |
| C1-H1A...F1                 | 0.96 | 2.581(2) | 3.224(2) | 125     |
| C12-H12A...F2               | 0.96 | 2.415(2) | 3.082(4) | 126     |

Symmetry code: (i) -0.5-x, 0.5+y, 0.5-z; (ii) -1-x, 1-y, -z.

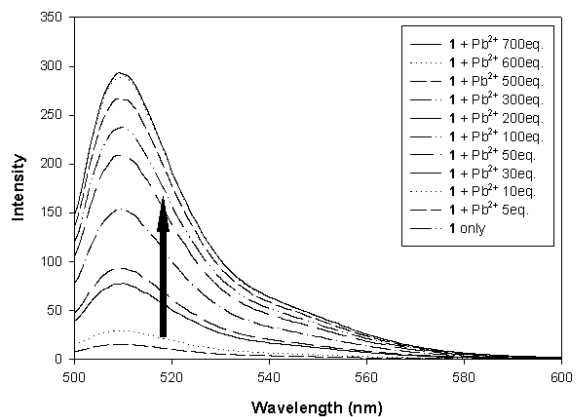

**S-Figure 2.** Fluorescent titrations of **1** (1 μM) upon addition of Pb<sup>2+</sup> in acetonitrile (excitation at 504 nm).

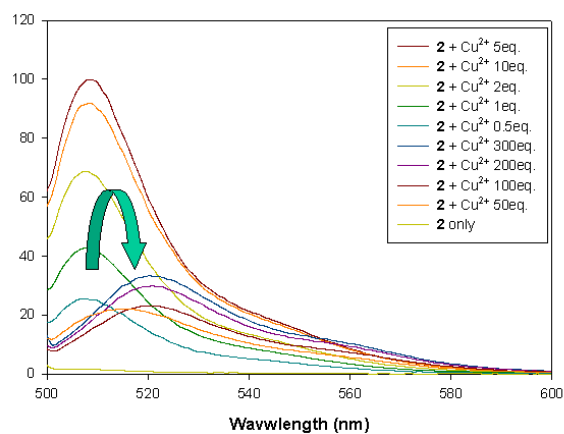

**S-Figure 3.** Fluorescent titrations of **2** (1 μM) upon addition of Cu<sup>2+</sup> in acetonitrile (containing 0.5 % water) (excitation at 504 nm).

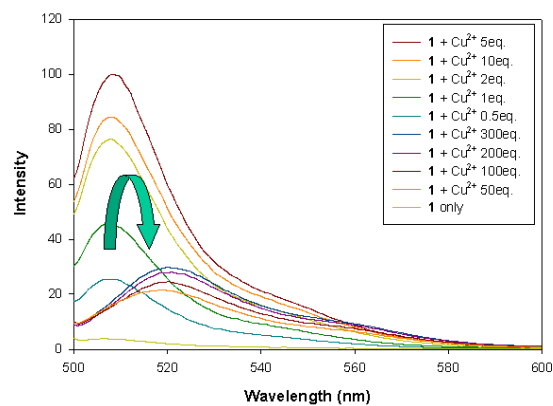

**S-Figure 4.** Fluorescent titrations of **1** (1 μM) upon addition of Cu<sup>2+</sup> in acetonitrile (containing 0.5 % water) (excitation at 504 nm).

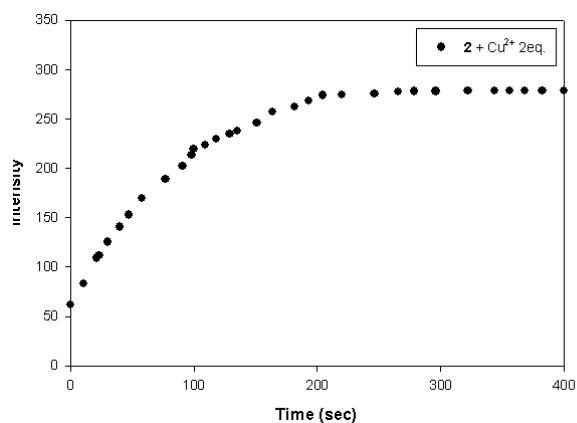

**S-Figure 5.** An assay of compound **2** (1  $\mu$ M) for  $\text{Cu}^{2+}$  (2 eq.) in acetonitrile. (excitation at 504 nm, emission at 510 nm).

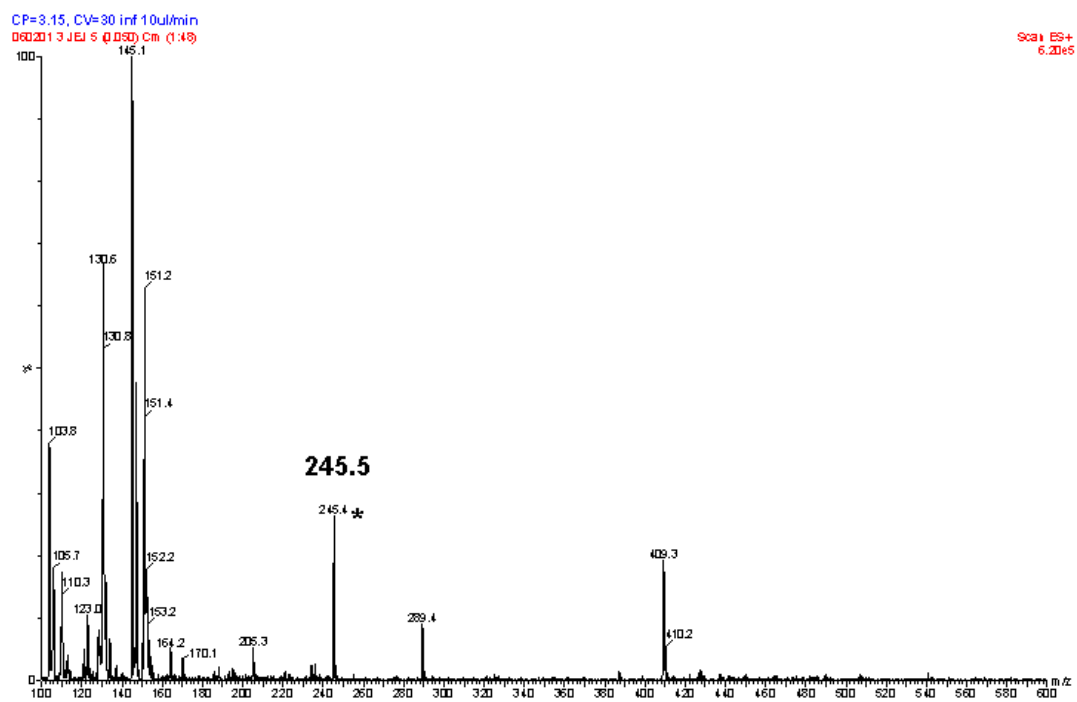

**S-Figure 6.** Electrospray ionization mass spectrum after hydrolysis of **2** in the presence of  $\text{Cu}^{2+}$  (10 eq.) in acetonitrile (containing 0.5 % water) ( $m/z$  245.5 corresponds to  $[\mathbf{1} + \text{Cu}]^{2+}$ ).

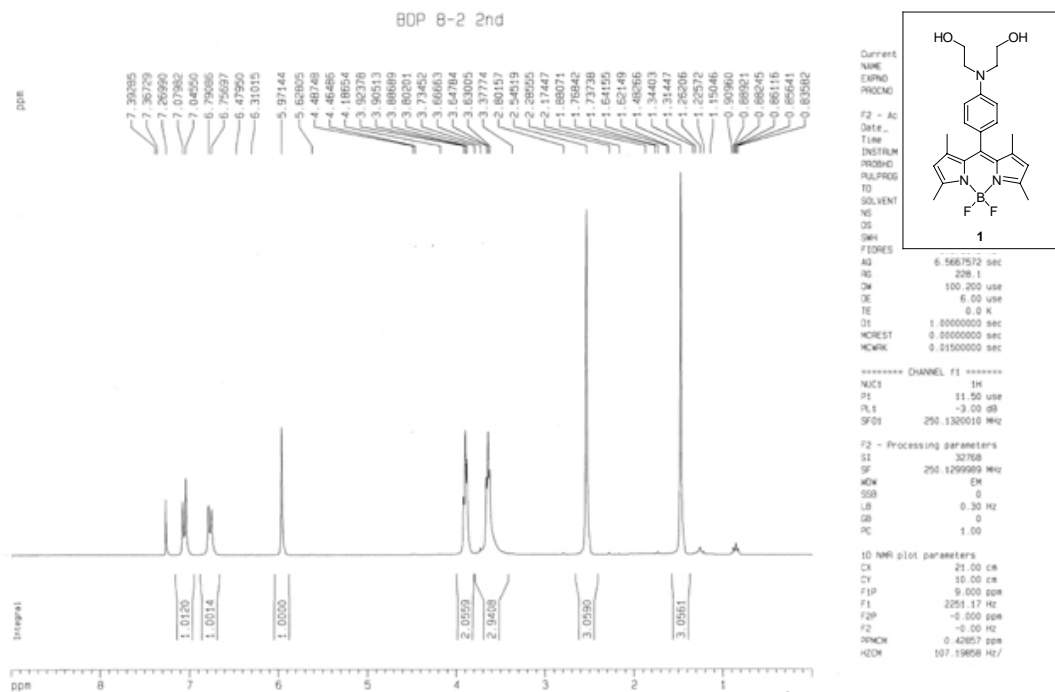

**S-Figure 7.** <sup>1</sup>H NMR (250 MHz) of compound **1** in CDCl<sub>3</sub>.

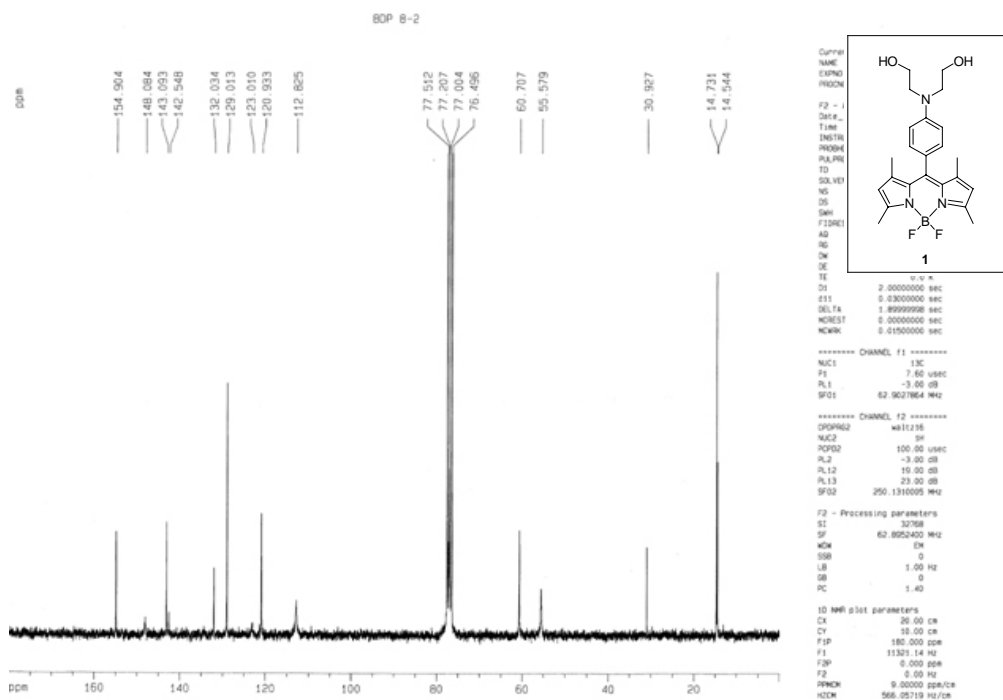

**S-Figure 8.** <sup>13</sup>C NMR (62.5 MHz) of compound **1** in CDCl<sub>3</sub>.

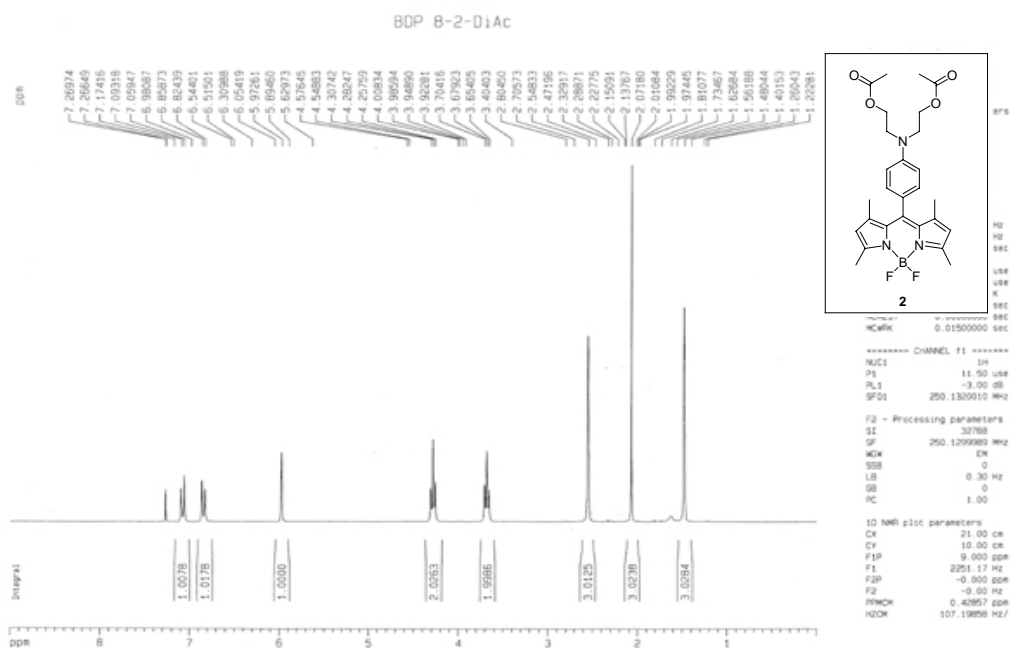

**S-Figure 9.**  $^1\text{H}$  NMR (250 MHz) of compound **2** in  $\text{CDCl}_3$ .

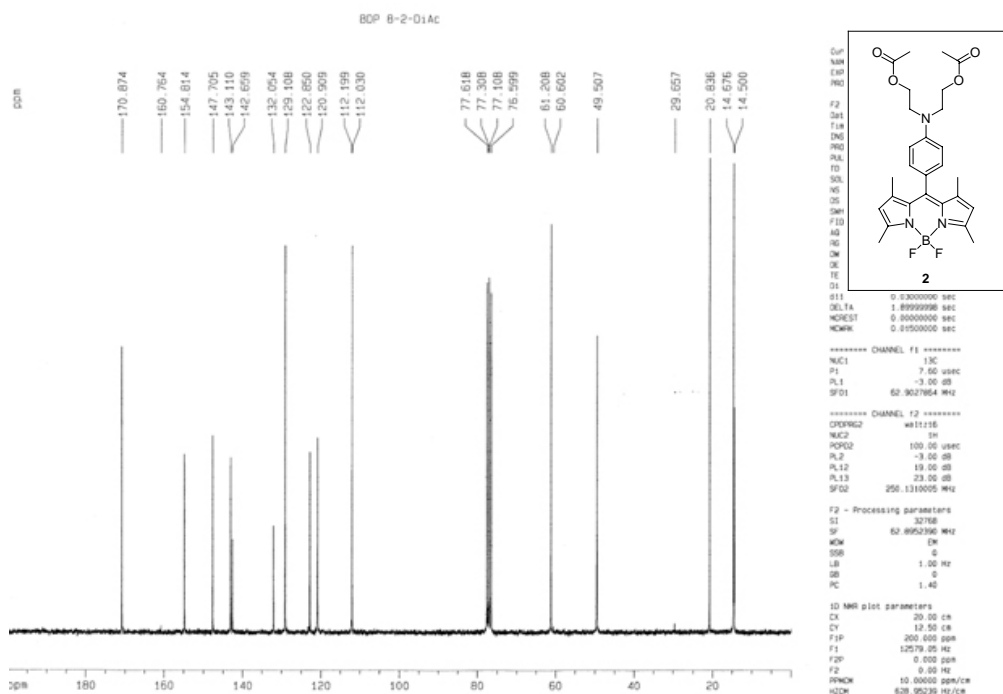

**S-Figure 10.**  $^{13}\text{C}$  NMR (62.5 MHz) of compound **2** in  $\text{CDCl}_3$ .
